# Supplementary material for: Sensitive fluorescence and visual detection of organophosphorus pesticides with a Ru(bpy)32+–ZIF-90–MnO2 sensing platform
Source: Royal Society of Chemistry journal article supplement (doi:10.1039/d1ay00841b), 2021-01-01
Supplement: d1ay00841b1.pdf [file d1ay00841b1.pdf]

Supporting information for

**Sensitive Fluorescence and Visual Detection of  
Organophosphorus Pesticides with  
Ru(bpy)<sub>3</sub><sup>2+</sup>-ZIF-90-MnO<sub>2</sub> Sensing Platform**

Jun Li<sup>a, †</sup>, Yingwei Weng<sup>a, †</sup>, Can Shen<sup>a</sup>, Jiao Luo<sup>a</sup>, Donghong Yu<sup>b</sup>, Zhong Cao<sup>a,\*</sup>

<sup>a</sup>Hunan Provincial Key Laboratory of Materials Protection for Electric Power and Transportation, and Hunan Provincial Key Laboratory of Cytochemistry, School of Chemistry and Biological Engineering, Changsha University of Science and Technology, Changsha, 410114, P. R. China

<sup>b</sup>Department of Chemistry and Bioscience, Aalborg University, DK-9220 Aalborg, East, Denmark

<sup>†</sup>J. L. and Y. W. as the co-first authors contributed equally to this work.

\*To whom correspondence should be addressed. *E*-mail: caoz@csust.edu.cn

|                                                                                   |      |
|-----------------------------------------------------------------------------------|------|
| Chemicals and Instruments.....                                                    | 3    |
| Synthesis of ZIF-90.....                                                          | 4    |
| Construction of Ru(bpy) <sub>3</sub> <sup>2+</sup> -ZIF-90-MnO <sub>2</sub> ..... | 4    |
| Detection Procedure for AChE.....                                                 | 4    |
| OPs Detection in Real Samples.....                                                | 5    |
| Data.....                                                                         | 6    |
| Figure S1.....                                                                    | 6    |
| Figure S2.....                                                                    | 6    |
| Figure S3.....                                                                    | 7    |
| Figure S4.....                                                                    | 7    |
| Figure S5.....                                                                    | 8    |
| Figure S6.....                                                                    | 8    |
| Figure S7.....                                                                    | 9    |
| Figure S8.....                                                                    | 9    |
| Figure S9.....                                                                    | 10   |
| Figure S10.....                                                                   | 10   |
| Figure S11.....                                                                   | 12   |
| Figure S12.....                                                                   | 1312 |
| Figure S13.....                                                                   | 13   |
| Table S1.....                                                                     | 14   |
| Table S2.....                                                                     | 15   |
| References.....                                                                   | 15   |

## Chemicals and Instruments

Zinc acetate ( $\text{Zn}(\text{CH}_3\text{COO})_2$ ) and Imidazole-2-carboxyaldehyde (2-ICA) were purchased from Titan Scientific Co., Ltd. (Shanghai, China) and Macklin Biochemical Co., Ltd. (Shanghai, China). Tetramethylammonium hydroxide, glycine (Gly), L-glutamic acid (L-Glu), and manganese chloride ( $\text{MnCl}_2 \cdot 4\text{H}_2\text{O}$ ) were supplied by Sinopharm Chemical Reagent Co., Ltd.. Acetylcholinesterase (AChE, 500 units, from *Electrophorus electricus*), bovine serum albumin (BSA), catalase (CAT), L-cysteine (L-Cys), and glucose oxidase (GOx) were bought from Sigma-Aldrich Co., Ltd.. Acetylthiocholine (ATCh) iodide, parathion-methyl, dichlorvos, chlorpyrifos, paraquat, fenvalerate, tris-(2-terephthalic acid 2'-bipyridine), imidacloprid, acetochlor, nitenpyram, and ruthenium dichloride ( $\text{Ru}(\text{bpy})_3\text{Cl}_2 \cdot 6\text{H}_2\text{O}$ , >98%) were supplied by Aladdin Biochemical Technology Co., Ltd. (Shanghai, China). Malathion, omethoate and paraoxon were offered by Huaerbo Technology Co., Ltd. (Beijing, China). Milli-Q water ( $18.2 \text{ M}\Omega \cdot \text{cm}^{-1}$ ) was employed for experimental sample preparation.

Scanning electron microscopic (SEM, SU8010, Hitachi), transmission electron microscopy (TEM, Talos F200X), and high-annular dark-field scanning TEM (HAADF-STEM) images with an energy dispersed X-ray detector (EDX) were used for detailed composition analysis of the prepared samples. Powder X-ray diffraction (PXRD) measurements were carried out on a D8-ADVANCE powder diffractometer. Nitrogen adsorption-desorption isotherm was obtained on a Micromeritics ASAP 2460 Sorptometer. The surface potential was measured using a nanoparticle size and

zeta potentiometer (Zetasizer Nano ZS90, Malvern Instruments, UK). The UV-2700 spectrophotometer (Shimadzu Co., Japan) was used to collect the UV-Vis spectra. The fluorescent emission spectra were recorded by the F-7000 fluorescence spectrophotometer (Hitachi Co., Japan).

### **Synthesis of ZIF-90**

ZIF-90 was synthesized using the reported method.<sup>1</sup> Zn(CH<sub>3</sub>COO)<sub>2</sub> (73.3 mg, 0.1 M) and imidazole-2-carboxyaldehyde (2-ICA) (76.9 mg, 0.2 M) were separately dissolved in 4 mL DMF solution. Under vigorous stirring, the as-prepared two solution were mixed. After 5 min, another 10 mL of DMF was added into the mixture to further stabilize the crystal products about 30 min, and then centrifugation and washing with DMF and ethanol for three times. Finally, the resulting solid was dried overnight at 60 °C under vacuum for further use.

### **Construction of Ru(bpy)<sub>3</sub><sup>2+</sup>-ZIF-90-MnO<sub>2</sub>**

10 μL of the synthesized Ru(bpy)<sub>3</sub><sup>2+</sup>-ZIF-90 (1 mg/mL) and 225 μL of the prepared MnO<sub>2</sub> NSs solution were mixed in 265 μL of PBS (10 mM, pH 7.0). And then the resulted aqueous suspension was further incubated for 10 min to form the Ru(bpy)<sub>3</sub><sup>2+</sup>-ZIF-90-MnO<sub>2</sub> composites.

### **Detection Procedure for AChE**

Various concentrations of AChE (50 μL) were incubated with ATCh (25 mM, 100 μL) for 20 min at 37 °C. Then, MnO<sub>2</sub> NSs (2 mg/mL, 225 μL) and Ru(bpy)<sub>3</sub><sup>2+</sup>-ZIF-90 (1 mg/mL, 10 μL) were added to the above solution. Subsequently, the mixture was diluted to 500 μL with PBS (10 mM, pH 7.0) and

mixed thoroughly for 10 min before the fluorescence spectra were collected at an excitation wavelength of 450 nm.

### **OPs Detection in Real Samples**

This proposed strategy was employed to detect parathion-methyl in environmental and agricultural samples, including lake water, tap water and cabbage samples. The lake water (10 mL) was filtered with a 0.22  $\mu\text{m}$  filter membrane to remove insoluble materials and the tap water (10 mL) was boiled to remove chlorine. Then, the processed water samples mixed with 10 mL PBS (10 mM, pH 7.4) containing 20 % methanol. The cabbage (10 g) was ground and mixed with 50 mL of acetonitrile under sonication for 10 min and centrifuged to get the supernatant. This extraction procedure was repeated for three times, and the extract was combined and evaporated to dryness, followed by dissolved by PBS (10 mM, pH 7.4) containing 20 % methanol. Subsequently, the prepared three samples were spiked with 5, 20 and 50 ng/mL parathion-methyl standards, respectively. The recovery rates (%) and relative standard deviations (RSD) (n=3, %) were calculated to evaluate the value of the strategy.

## Data

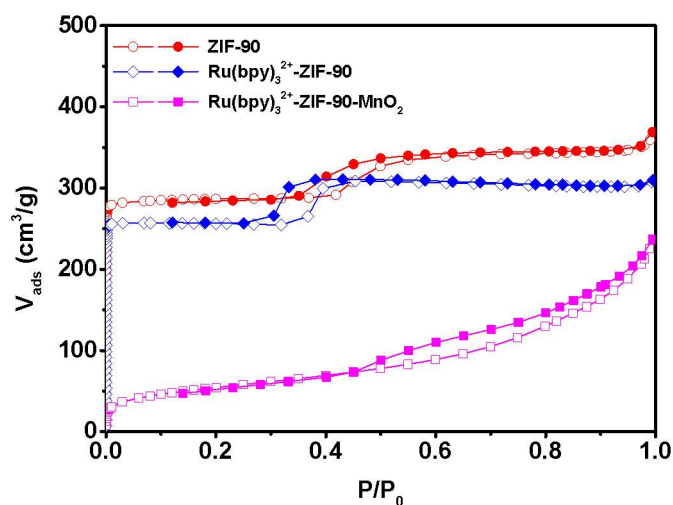

**Fig. S1.** N<sub>2</sub> sorption isotherms of ZIF-90, Ru(bpy)<sub>3</sub><sup>2+</sup>-ZIF-90, and Ru(bpy)<sub>3</sub><sup>2+</sup>-ZIF-90-MnO<sub>2</sub> composites. The BET surface areas of the three samples are 1064, 951, and 192 m<sup>2</sup>/g, respectively. (Filled and open symbols represent desorption and adsorption branches, respectively).

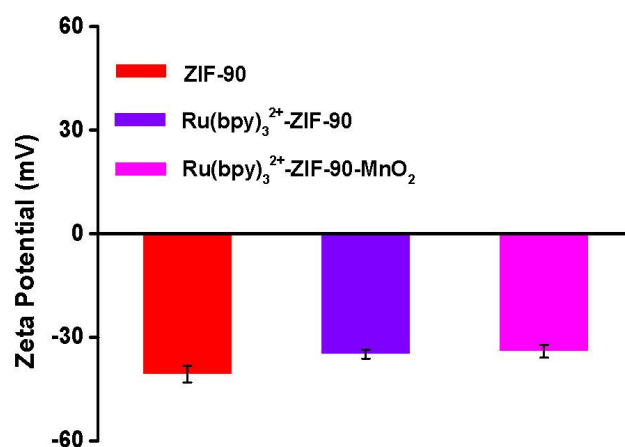

**Fig. S2.** Zeta potentials of ZIF-90, Ru(bpy)<sub>3</sub><sup>2+</sup>-ZIF-90, and Ru(bpy)<sub>3</sub><sup>2+</sup>-ZIF-90-MnO<sub>2</sub>.

Error bars indicate s.d. (n = 3).

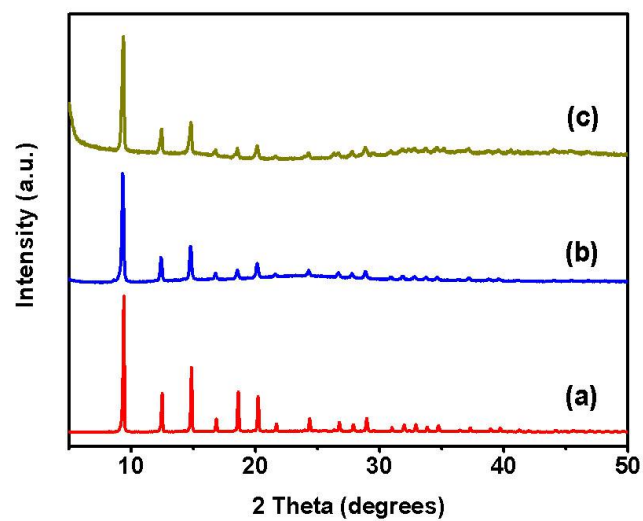

**Fig. S3.** Powder X-ray diffraction (XRD) profiles of (a) as-synthesized ZIF-90, (b)  $\text{Ru}(\text{bpy})_3^{2+}$ -ZIF-90, and (c)  $\text{Ru}(\text{bpy})_3^{2+}$ -ZIF-90 immersed in water for 24 h.

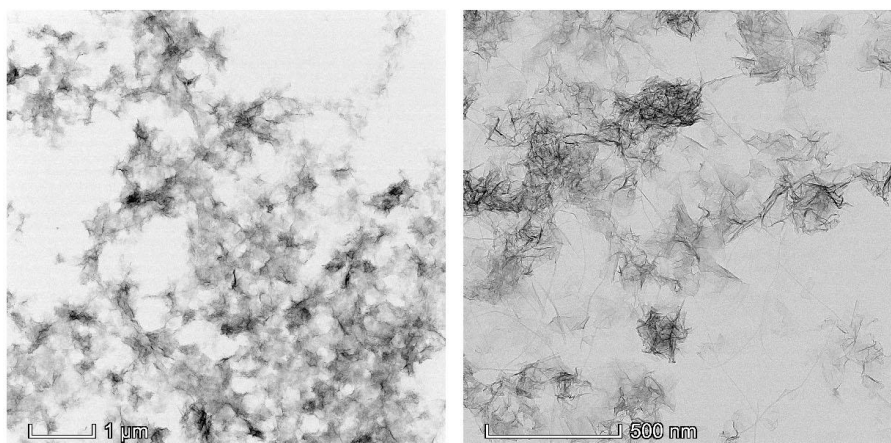

**Fig. S4.** TEM images of  $\text{MnO}_2$  at different magnifications.

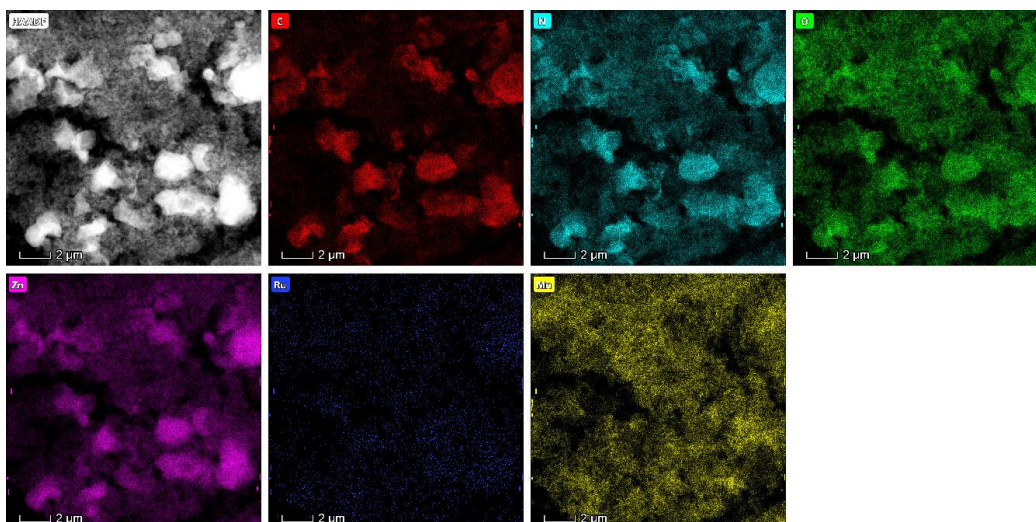

**Fig. S5.** HAADF-STEM image and elemental mappings of  $\text{Ru}(\text{bpy})_3^{2+}$ -ZIF-90- $\text{MnO}_2$  under high resolution revealing the elemental distribution.

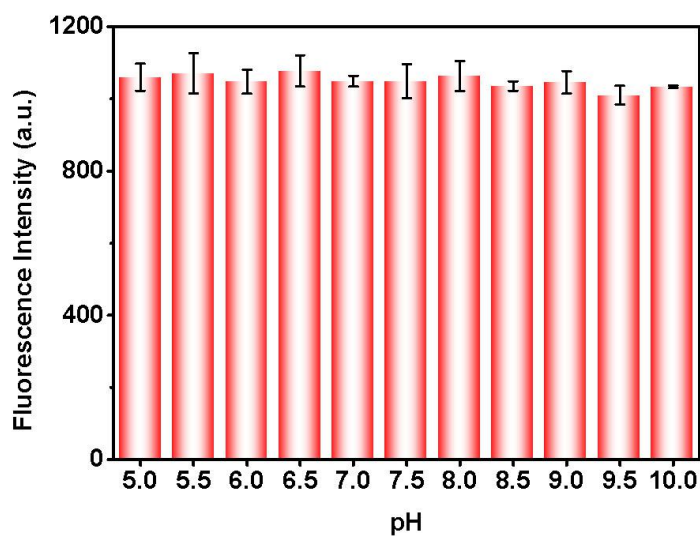

**Fig. S6.** Fluorescence intensity of the  $\text{Ru}(\text{bpy})_3^{2+}$ -ZIF-90 fluorescent probe at different pH values. Error bars indicate s.d. ( $n = 3$ ).



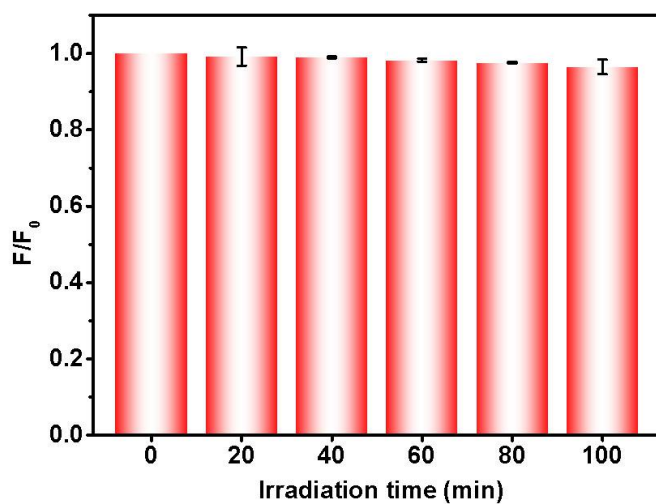

**Fig. S7.** Stability of photoluminescence of the Ru(bpy)<sub>3</sub><sup>2+</sup>-ZIF-90 fluorescent probe under the UV lamp. Where  $F_0$  and  $F$  are the fluorescence intensity of Ru(bpy)<sub>3</sub><sup>2+</sup>-ZIF-90 fluorescent probe under UV light for 0 min and different times, respectively. Error bars indicate s.d. (n = 3).

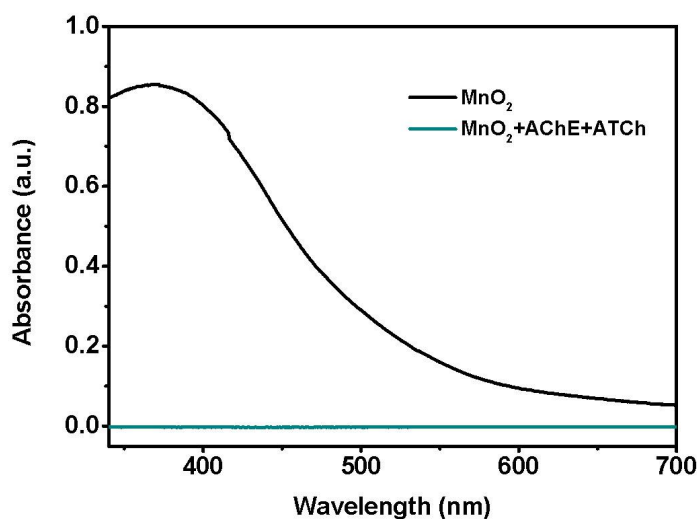

**Fig. S8.** The UV-vis absorption spectra of MnO<sub>2</sub> NSs in the absence and presence of AChE+ATCh.

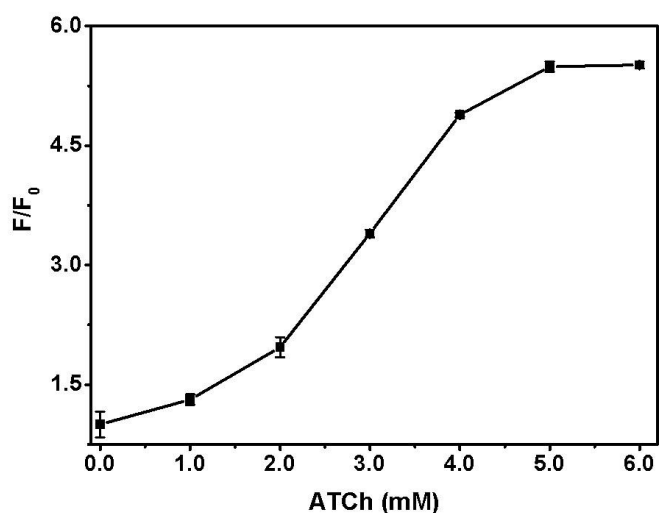

**Fig. S9.** The relative fluorescence enhancement ( $F/F_0$ ) under different concentrations of ATCh (0, 1.0, 2.0, 3.0, 4.0, 5.0, and 6.0 mM final solution). The fluorescence signal was collected at 600 nm. Where  $F$  and  $F_0$  are the fluorescence intensity of the  $\text{Ru}(\text{bpy})_3^{2+}$ -ZIF-90- $\text{MnO}_2$ -AChE mixture in the presence and absence of ATCh, respectively. Error bars indicate s.d. ( $n = 3$ ).

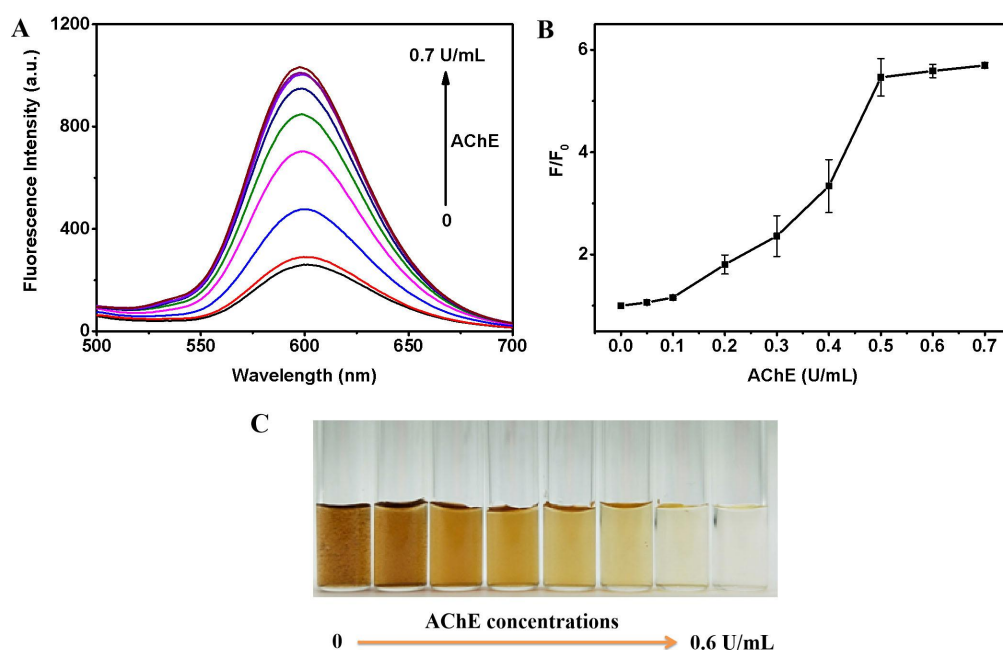

**Fig. S10.** (A) The fluorescence spectra of  $\text{Ru}(\text{bpy})_3^{2+}$ -ZIF-90- $\text{MnO}_2$ -ATCh mixture

with various concentrations of AChE. Final concentrations of AChE are 0, 0.05, 0.1, 0.2, 0.3, 0.4, 0.5, 0.6, and 0.7 U/mL. (B) The  $F/F_0$  under different concentrations of ATCh. Where  $F$  and  $F_0$  are the fluorescence intensity of the  $\text{Ru}(\text{bpy})_3^{2+}$ -ZIF-90-MnO<sub>2</sub>-ATCh mixture in the presence and absence of AChE. (C) The corresponding photographs of the system taken under sunlight.

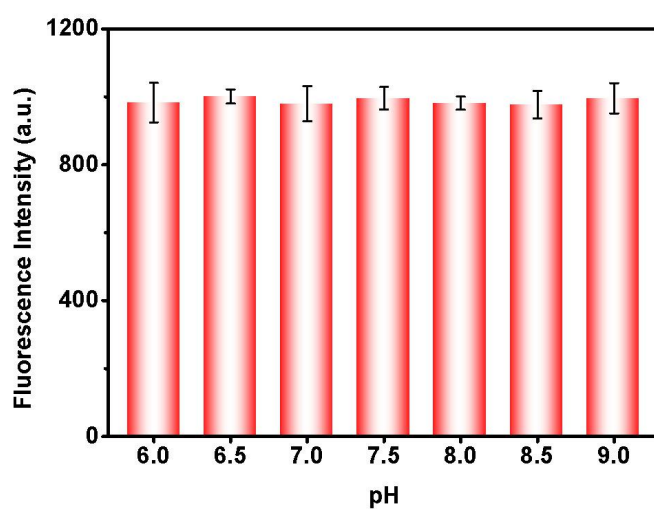

**Fig. S11.** Fluorescence intensity of the  $\text{Ru}(\text{bpy})_3^{2+}$ -ZIF-90-MnO<sub>2</sub>+AChE-ATCh sensing system under different pH conditions. Error bars indicate s.d. (n = 3).

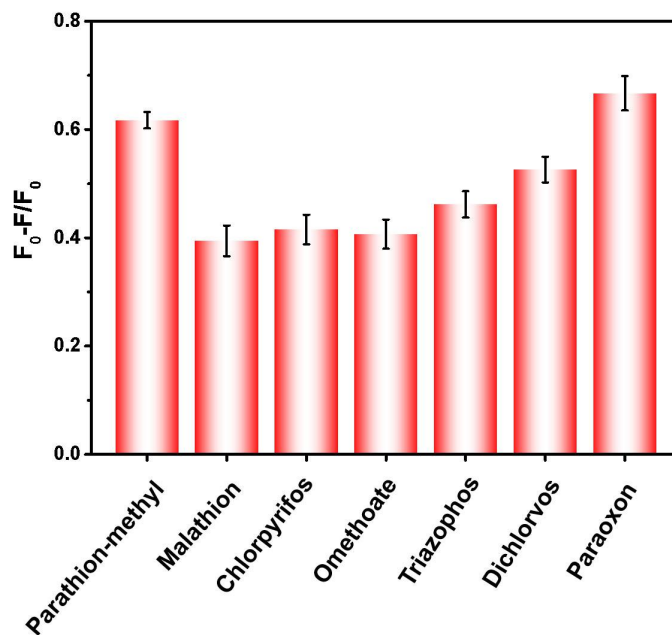

**Fig. S12.** Other OPs determination based on the inhibition efficiency  $((F_0-F)/F_0)$  of AChE.  $F$  and  $F_0$  were the fluorescence intensity of the sensing system in the presence and absence of the different OPs. The concentrations of parathion-methyl, malathion, chlorpyrifos, omethoate, triazophos, dichlorvos, and paraoxon were all 20 ng/mL.

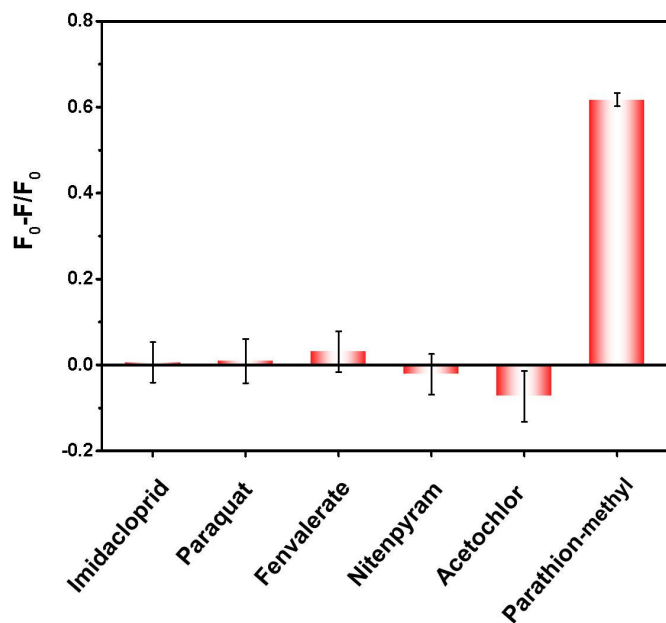

**Fig. S13.** The other kind of pesticides determination based on the inhibition efficiency  $((F_0 - F)/F_0)$  of AChE.  $F$  and  $F_0$  were the fluorescence intensity of the sensing system in the presence and absence of the different pesticides. The concentrations of imidacloprid, paraquat, fenvalerate, nitenpyram, acetochlor, and parathion-methyl were all 20 ng/mL.

**Table S1** Comparison of performance of different parathion-methyl probing strategy

| Method                               | Linear range<br>(ng/mL) | Detection limit<br>(ng/mL) | Reference |
|--------------------------------------|-------------------------|----------------------------|-----------|
| Electrochemical assay                | $132-3.9 \times 10^4$   | 5.3                        | [2]       |
| Electrochemical assay                | $0.40-7.0 \times 10^3$  | 0.10                       | [3]       |
| Electrochemistry assay               | $0.26-4.6 \times 10^4$  | 0.045                      | [4]       |
| Electrochemistry assay               | 0.080-5.3<br>5.3-40     | 0.024                      | [5]       |
| Enzyme-linked<br>immunosorbent assay | 0.40-19                 | 0.20                       | [6]       |
| Fluorescence assay                   | $1.0-1.0 \times 10^3$   | 0.12                       | [7]       |
| Fluorescence assay                   | $70-5.0 \times 10^3$    | 0.12                       | [8]       |
| Fluorescence assay                   | $197-5.3 \times 10^3$   | 25                         | [9]       |
| Chemiluminescence<br>enzyme assay    | $0.50-1.0 \times 10^3$  | 0.50                       | [10]      |
| Fluorescence and visual<br>assay     | 0.050-60                | 0.037                      | This work |

**Table S2** Detection of parathion-methyl in environmental and agricultural samples

| Sample     | Spiked<br>(ng/mL) | Detected<br>(ng/mL) | Recovery<br>(%) | RSD<br>(n=3, %) |
|------------|-------------------|---------------------|-----------------|-----------------|
| Lake water | 5                 | 4.81                | 96.2            | 6.2             |
|            | 20                | 18.70               | 93.5            | 5.2             |
|            | 50                | 49.14               | 98.3            | 5.6             |
| Tap water  | 5                 | 4.98                | 99.5            | 2.3             |
|            | 20                | 20.73               | 103.6           | 6.7             |
|            | 50                | 48.52               | 97.0            | 5.9             |
| Cabbage    | 5                 | 4.67                | 93.3            | 4.1             |
|            | 20                | 18.95               | 94.7            | 2.1             |
|            | 50                | 48.63               | 97.3            | 2.5             |

## References

- [1] J. J. Deng, K. Wang, M. Wang, P. Yu and L. Q. Mao, *J. Am. Chem. Soc.*, 2017, **139**, 5877-5882.
- [2] X. Y. Gao, Y. Gao, C. C. Bian, H. Y. Ma and H. L. Liu, *Electrochim. Acta.*, 2019, **310**, 78-85.
- [3] T. Tao, Y. Zhou, C. H. He, H. P. He, M. Y. Ma, Z. W. Cai, N. Gao, K. Wang, R. Z. Zhu, G. Chang, Z. H. Liu and Y. B. He, *Electrochim. Acta.*, 2020, **357**, 136836.
- [4] K. P. Gannavarapu, V. Ganesh, M. Thakkar, S. Mitra and R. B. Dandamudi, *Sens Actuators B Chem.*, 2019, **288**, 611-617.
- [5] J. Y. Yao, Z. P. Liu, M. L. Jin, Y. Y. Zou, J. M. Chen, P. Xie, X. Wang, E. M. Akinoglu, G. F. Zhou and L. L. Shui, *Sens. Actuators B Chem.*, 2020, **321**, 128517.
- [6] L. P. Yuan, B. Liu, K. D. Yin, G. D. Yang, L. Huang and Y. H. Nie, *Anal. Lett.*, 2013, **46**, 1084-1096.
- [7] X. H. Xu, Y. N. Guo, X. Y. Wang, W. Li, P. P. Qi, Z. W. Wang, X. Q. Wang, S. Gunasekaran and Q. Wang, *Sens. Actuators B Chem.*, 2018, **260**, 339-345.
- [8] K. Y. He, Z. S. Li, L. Wang, Y. C. Fu, H. R. Quan, Y. B. Li, X. Q. Wang, S.

Gunasekaran and X. H. Xu, *ACS Appl. Mater. Interfaces*, 2019, **11**, 26250-26260.

[9] X. Hu, F. Y. Wang, Q. Q. Peng, J. Hu, H. Q. Peng, L. Li, B. Z. Zheng, J. Du and D. Xiao, *RSC Adv.*, 2019, **9**, 13048-13053.

[10] R. K. Mishra, K. Deshpande and S. Bhand, *Sensors*, 2010, **10**, 11274-11286.
